# Supplementary material for: Comparison of the Efficacy and Safety of Single- versus Double-Balloon Enteroscopy Performed by Endoscopist Experts in Single-Balloon Enteroscopy: A Single-Center Experience and Meta-Analysis
Source: PubMed Central journal article supplement — Gut Liver. 2017 Apr 11;11(4):520–7. doi: 10.5009/gnl16330 (PMC5491087; doi:10.5009/gnl16330), 2017-04-11
Supplement: gnl-11-528_suppl.pdf [file gnl-11-528_suppl.pdf]

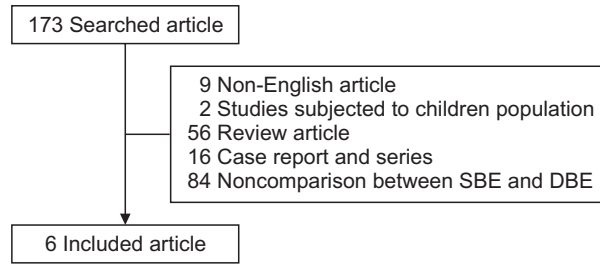

**Supplementary Fig. 1.** Literature search.  
SBE, single-balloon enteroscopy; DBE, double-balloon enteroscopy.

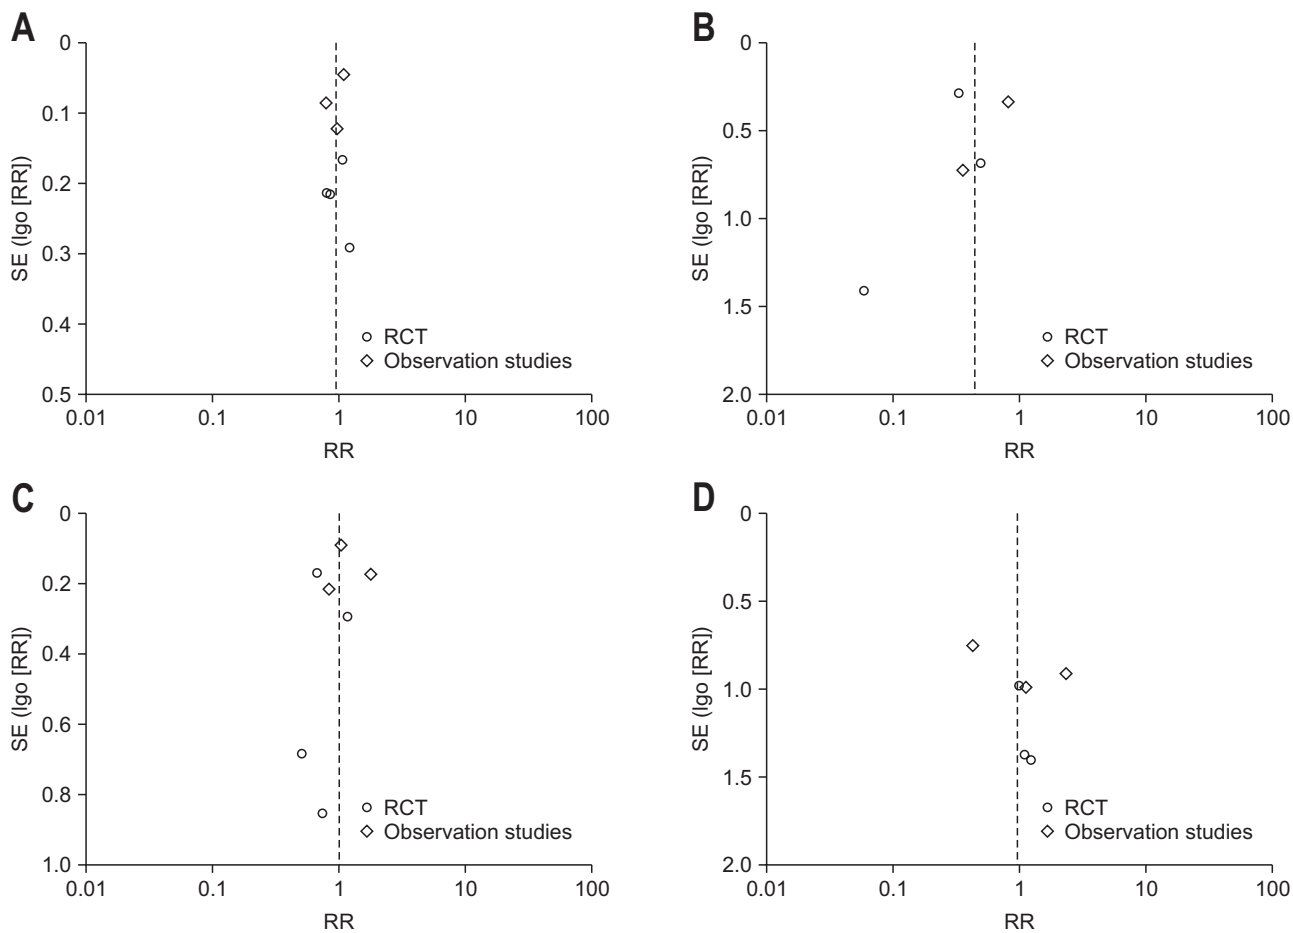

**Supplementary Fig. 2.** Funnel plot of the included study for the analysis of (A) the diagnostic yield, (B) the total enteroscopy rate, (C) the therapeutic yield and (D) the complication rate of single-balloon enteroscopy compared with that of double-balloon enteroscopy. SE, standard error; RR, risk ratio; RCT, randomized controlled trial.

**Supplementary Table 1.** Demographics and Outcome Characteristics of the Included Studies

| Year, nation                         | Research design | Indication                      | Instruments                    |               | Setting       | Endoscopist's experience                      |                                                  | Diagnostic yield |               |       | Total enteroscopy |       |     | Therapeutic yield |       |       | Complication |     |               |       |       |       |       |    |
|--------------------------------------|-----------------|---------------------------------|--------------------------------|---------------|---------------|-----------------------------------------------|--------------------------------------------------|------------------|---------------|-------|-------------------|-------|-----|-------------------|-------|-------|--------------|-----|---------------|-------|-------|-------|-------|----|
|                                      |                 |                                 | DBE                            | SBE           |               | SBE                                           | DBE                                              | SBE              | DBE (control) | Total | Event             | Total | SBE | DBE (control)     | Total | Event | Total        | SBE | DBE (control) | Total | Event | Total |       |    |
|                                      |                 |                                 |                                |               |               |                                               |                                                  |                  |               |       |                   |       |     |                   |       |       |              |     |               |       |       |       |       |    |
| Randomized controlled trials         |                 |                                 |                                |               |               |                                               |                                                  |                  |               |       |                   |       |     |                   |       |       |              |     |               |       |       |       |       |    |
| Domagk <i>et al.</i> <sup>5</sup>    | 2011            | Prospective randomized study    | EN-450P5, EN-450T5             | SIF-Q180      | Multicenter   | At least 50 SBE procedures                    | Extensive experience using DBE                   | 24               | 65            | 28    | 65                | 3     | 65  | 6                 | 65    | 3     | 65           | 6   | 65            | 0     | 65    | 0     | 65    |    |
| Efthymiou <i>et al.</i> <sup>7</sup> | 2012            | Prospective randomized study    | Not mentioned                  | Not mentioned | Multicenter   | Staff: at least 20 SBEs                       | Staff: at least 200 DBEs                         | 30               | 53            | 35    | 66                | -     | -   | -                 | 16    | 53    | 17           | 66  | 1             | 53    | 1     | 53    | 1     | 66 |
| May <i>et al.</i> <sup>4</sup>       | 2010            | Prospective randomized study    | EN450-P5                       | EN450-P5      | Multicenter   | Training for 2 mo                             | At least 50 DBE under direct staff's supervision | 21               | 50            | 26    | 50                | 11    | 50  | 33                | 50    | 24    | 50           | 36  | 50            | 2     | 50    | 2     | 50    |    |
| Takano <i>et al.</i> <sup>6</sup>    | 2011            | Prospective randomized study    | EN-450T5                       | SIF-Q260      | Single center | At least 10 BAE                               |                                                  | 11               | 18            | 10    | 20                | 0     | 14  | 8                 | 14    | 2     | 18           | 3   | 20            | 1     | 18    | 1     | 20    |    |
| Observational comparison studies     |                 |                                 |                                |               |               |                                               |                                                  |                  |               |       |                   |       |     |                   |       |       |              |     |               |       |       |       |       |    |
| Lenz <i>et al.</i> <sup>11</sup>     | 2013            | Retrospective analysis          | EN-450P5, EN-450T5             | SIF-Q180      | Single-center | Great experience of the involved endoscopists |                                                  | 114              | 298           | 292   | 606               | 12    | 298 | 30                | 606   | 44    | 298          | 88  | 1,052         | 2     | 298   | 3     | 1,052 |    |
| Pinho <i>et al.</i> <sup>12</sup>    | 2016            | Retrospective descriptive study | EN-450P5/20, EN-450T5, EN-580T | SIF-Q180      | Multicenter   | Not mentioned                                 | Not mentioned                                    | 234              | 351           | 648   | 1,054             | -     | -   | -                 | -     | 112   | 351          | 322 | 1,054         | 2     | 351   | 14    | 1,054 |    |

DBE, double-balloon enteroscopy; SBE, single-balloon enteroscopy; SB, small bowel; OGIB, obscure gastrointestinal bleeding; BAE, balloon-assisted enteroscopy; IBD, inflammatory bowel disease.
